# Supplementary material for: Curcumin overcome primary gefitinib resistance in non-small-cell lung cancer cells through inducing autophagy-related cell death
Source: Springer Nature journal article supplement (doi:10.1186/s13046-019-1234-8), 2019-06-13
Supplement: 13046_2019_1234_MOESM2_ESM.pdf [file 13046_2019_1234_MOESM2_ESM.pdf]

## **Additional file 2:**

**Table S1 List of primer sequences used in this study**

| <b>Primer for RT-PCR</b> |               |                                             |
|--------------------------|---------------|---------------------------------------------|
| <b>Gene</b>              | <b>Primer</b> | <b>Sequences (5'-3')</b>                    |
| Sp1                      | forward       | ACACGTTCCGGATGAGCTACAG                      |
|                          | reverse       | TGGGCCTCCCTTCTTATTCTG                       |
| EGFR                     | forward       | ATGCTCTACAACCCACCA                          |
|                          | reverse       | GCCCTTCGCACTTCTTACAC                        |
| c-Met                    | forward       | CCACCCTTTGTTTCAGTGTGG                       |
|                          | reverse       | AGTCAAGGTGCAGCTCTCAT                        |
| Her2                     | forward       | GGTGGTCTTTGGGATCCTCA                        |
|                          | reverse       | ACCTTCACCTTCCTCAGCTC                        |
| AXL                      | forward       | GGTGGCTGTGAAGACGATGA<br>CTCAGATACTCCATGCCA  |
|                          | reverse       | GACAACCAGAACTTGCAGCA<br>CCCTTTAGTCCCCGTCCTT |
| $\beta$ -actin           | forward       | GCAAAGACCTGTACGCCAAC                        |
|                          | reverse       | CTAGAAGCATTTGCGGTGGA                        |
